# Supplementary material for: Genetic basis for phenotypic differences between different Toxoplasma gondii type I strains
Source: PubMed Central journal article supplement (PMC3710486; doi:10.1186/1471-2164-14-467), 2013-07-10
Supplement: 1471-2164-14-467-S7.pdf [file 1471-2164-14-467-S7.pdf]

# Supplementary Figure 2.

|              |            |            |            |            |            |            |
|--------------|------------|------------|------------|------------|------------|------------|
| GT1_GRA15    | MVTTTTPTPP | PGAPAVVPIF | DVYQLNPHV  | FRSFRSRRR  | ARRVSSKSR  | SIIRNLGYLT |
| RH-ERP_GRA15 | .....      | .....      | .....      | .....      | .....      | .....      |
| RH-JSR_GRA15 | .....      | .....      | .....      | .....      | .....      | .....      |
| GT1_GRA15    | VLAAVILLGA | YAVRRLSRDL | SDSVRETRRG | RRITGSVPPG | TTRPSESCT  | GTQVDGGCGA |
| RH-ERP_GRA15 | .....      | .....      | .....      | .....      | .....      | .....      |
| RH-JSR_GRA15 | .....      | .....      | .....      | .....      | .....      | .....      |
| GT1_GRA15    | DTSTDGKSES | EQTENGEDSR | FSTRTPIHVT | ASTSPFATRK | AAEERSSSPR | DRKVPEGAQL |
| RH-ERP_GRA15 | .....      | .....      | .....      | .....      | .....      | .....      |
| RH-JSR_GRA15 | .....      | .....      | .....      | .....      | .....      | .....      |
| GT1_GRA15    | PTSSTPHAQR | KDSGSDSRNP | STLIPSPGTN | TFNMNFIYIG | AGSSALDFIF | PHTPDAQATV |
| RH-ERP_GRA15 | .....      | .....      | .....      | .....      | .....      | .....      |
| RH-JSR_GRA15 | .....      | .....      | .....      | .....      | .....      | .....      |
| GT1_GRA15    | VSPRSAAAA  | PTVETVPRVR | TYSTPTLTL  | TPAPATATSN | HMHASATPSP | PERPQNFR.G |
| RH-ERP_GRA15 | .....      | .....      | .....      | .....      | .....      | RNVLKTSVGD |
| RH-JSR_GRA15 | ...PQRGGR  | TNCRNSSKGS | HLLDTNNINP | TNGTSDRH-- | -----      | -----      |
| GT1_GRA15    | LMRQNGMVE. | TSLTTTEAGM | PAPLQSPQHI | ETEARLTYSN | HLKSPHPET  | PTVHSIDPVV |
| RH-ERP_GRA15 | SCGKTAWLRG | HR-----    | -----      | -----      | -----      | -----      |
| RH-JSR_GRA15 | -----      | -----      | -----      | -----      | -----      | -----      |
| GT1_GRA15    | GTSGHVAVG  | SQSPAGGPPT | DSRTPAALTP | TSSSFSHADS | LETSEHPQSG | PSLHPLISGI |
| RH-ERP_GRA15 | -----      | -----      | -----      | -----      | -----      | -----      |
| RH-JSR_GRA15 | -----      | -----      | -----      | -----      | -----      | -----      |
| GT1_GRA15    | QDAVQSQLPL | SQQETLPVVE | NATFFGQQT  | PFWMDETAAA | AIPLAPSQPG | SRTQPISSPH |
| RH-ERP_GRA15 | -----      | -----      | -----      | -----      | -----      | -----      |
| RH-JSR_GRA15 | -----      | -----      | -----      | -----      | -----      | -----      |
| GT1_GRA15    | TLPLSGGVS  | AVPGPPRTEN | PRQPQVGEN  | SYYSVPTEPY | PAQDMSPLIR | GTHSQTETVE |
| RH-ERP_GRA15 | -----      | -----      | -----      | -----      | -----      | -----      |
| RH-JSR_GRA15 | -----      | -----      | -----      | -----      | -----      | -----      |
| GT1_GRA15    | CGVNASSEGL | AAGAPSSKSA | ENAQTGGAG  | KSLLPVFLHP | QEQSPHSMT  | LGAGRFGSGE |
| RH-ERP_GRA15 | -----      | -----      | -----      | -----      | -----      | -----      |
| RH-JSR_GRA15 | -----      | -----      | -----      | -----      | -----      | -----      |
| GT1_GRA15    | LQRTISDPGP | QRAGATQADG | IGAGGPRDTQ | SAVTP-     | -----      | -----      |
| RH-ERP_GRA15 | -----      | -----      | -----      | -----      | -----      | -----      |
| RH-JSR_GRA15 | -----      | -----      | -----      | -----      | -----      | -----      |
