# Supplementary material for: Genetic basis for phenotypic differences between different Toxoplasma gondii type I strains
Source: PubMed Central journal article supplement (PMC3710486; doi:10.1186/1471-2164-14-467), 2013-07-10

# Supplementary Figure 3.

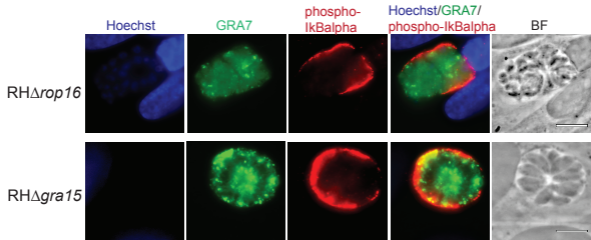

Supplement: 1471-2164-14-467-S8.pdf [file 1471-2164-14-467-S8.pdf]
